# Supplementary material for: Evaluation of the search and rescue LEEWAY model in the Tyrrhenian Sea: a new point of view
Source: Copernicus journal article supplement (doi:10.5194/nhess-16-1979-2016), 2016-08-29
Supplement: Supplementary file 1 [file nhess-16-1979-2016-supplement.zip]

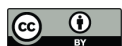

*Supplement of*

## **Evaluation of the search and rescue LEEWAY model in the Tyrrhenian Sea: a new point of view**

**Antonia Di Maio et al.**

*Correspondence to:* Antonia Di Maio ([antonia.dimaio@cnr.it](mailto:antonia.dimaio@cnr.it))

- [nhess-16-1979-2016-supplement-title-page.pdf](#)
- [BonariaExperiment.gif](#)

The copyright of individual parts of the supplement might differ from the CC-BY 3.0 licence.
